# Supplementary material for: One-pot synthesis of bimetallic metal–organic frameworks (MOFs) as acid–base bifunctional catalysts for tandem reaction
Source: Royal Society of Chemistry journal article supplement (doi:10.1039/c9cy01940e), 2019-12-17
Supplement: c9cy01940e1.pdf [file c9cy01940e1.pdf]

## Supplementary Information

### **One-pot Synthesis of Bimetallic Metal-Organic Frameworks (MOFs) as Acid-Base Bifunctional Catalysts for Tandem Reaction**

Yanjing Hu, Jian Zhang, Hang Huo, Zhe Wang, Xianzhu Xu, Kaifeng Lin\* and Ruiqing Fan\*

*MIIT Key Laboratory of Critical Materials Technology for New Energy Conversion and Storage, School of Chemistry and Chemical Engineering, Harbin Institute of Technology, Harbin, 150001, China.*  
*E-mail: linkaifeng@hit.edu.cn; fanruiqing@hit.edu.cn*

# Contents

## 1. ICP-AES Results

## 2. Figures

**Fig. S1.** The SEM images of MIL-101(Fe)-NH<sub>2</sub> MIL-101(Al/Fe)-NH<sub>2</sub>(20:1) MIL-101(Al/Fe)-NH<sub>2</sub>(10:1) and MIL-101(Al/Fe)-NH<sub>2</sub>(5:1).

**Fig. S2.** (a) The ATR-FTIR spectra of the catalysts; (b) The magnified FTIR spectra of the catalysts.

**Fig. S3.** (a) The N<sub>2</sub> adsorption-desorption isotherms; (b) The pore size distribution of MIL-101(Al)-NH<sub>2</sub> and MIL-101(Fe)-NH<sub>2</sub>, respectively.

**Fig. S4.** The pore size distribution of MIL-101(Al/Fe)-NH<sub>2</sub>(20:1), MIL-101(Al/Fe)-NH<sub>2</sub>(15:1), MIL-101(Al/Fe)-NH<sub>2</sub>(10:1) and MIL-101(Al/Fe)-NH<sub>2</sub>(5:1), respectively.

**Fig. S5.** The XPS spectra of the samples.

**Fig. S6.** High resolution of the XPS spectra of the catalysts. (a)-(c) MIL-101(Al/Fe)-NH<sub>2</sub>(15:1); (d)-(f) MIL-101(Al)-NH<sub>2</sub>; (g)-(i) MIL-101(Fe)-NH<sub>2</sub>.

**Fig. S7.** The cascade reaction at 110°C.

**Fig. S8.** The leaching test of the catalyst of MIL-101(Al/Fe)-NH<sub>2</sub>(15:1).

**Fig. S9.** The XRD of the MIL-101(Al/Fe)-NH<sub>2</sub>(15:1) and after catalyzed five cycles.

## 1. ICP-AES Results

**Table S1.** ICP-AES (Inductively Coupled Plasma Atomic Emission Spectrometry)

| Samples                               | Al %       | Fe %      |
|---------------------------------------|------------|-----------|
| MIL-101(Al/Fe)-NH <sub>2</sub> (20:1) | 10.60±0.51 | 0.15±0.01 |
| MIL-101(Al/Fe)-NH <sub>2</sub> (15:1) | 10.57±0.54 | 0.17±0.01 |
| MIL-101(Al/Fe)-NH <sub>2</sub> (10:1) | 9.77±0.48  | 0.25±0.02 |
| MIL-101(Al/Fe)-NH <sub>2</sub> (5:1)  | 9.41±0.37  | 0.38±0.02 |

## 2. Figures

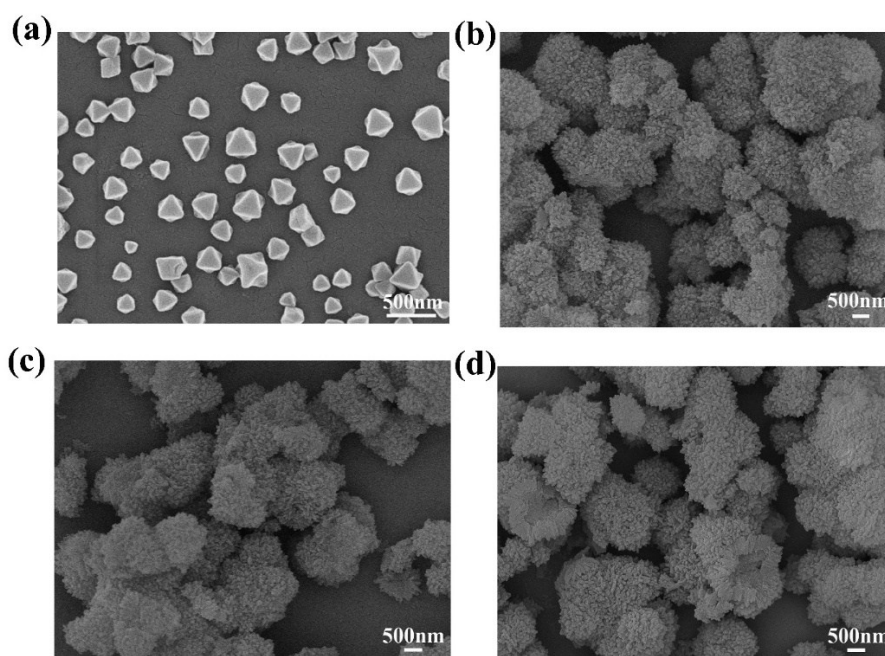

**Fig. S1.** The SEM image of MIL-101(Fe)-NH<sub>2</sub> MIL-101(Al/Fe)-NH<sub>2</sub>(20:1) MIL-101(Al/Fe)-NH<sub>2</sub>(10:1) and MIL-101(Al/Fe)-NH<sub>2</sub>(5:1).

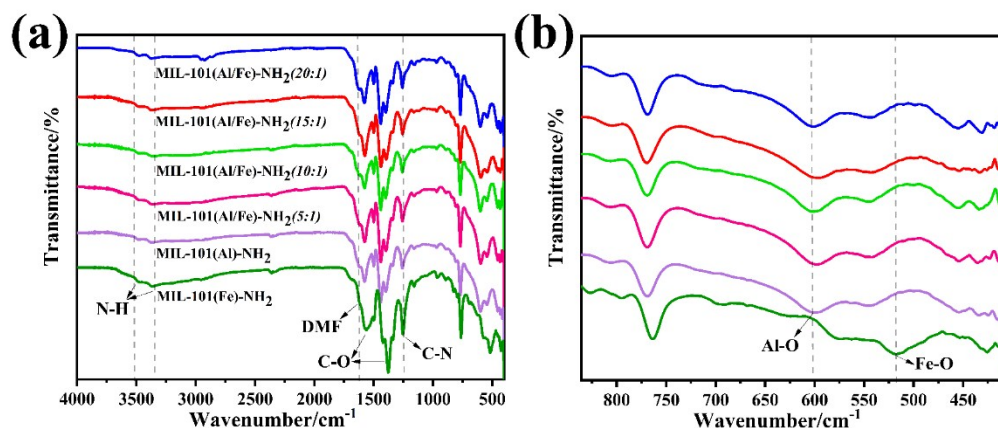

**Fig. S2.** (a) The ATR-FTIR spectra of the catalysts; (b) The magnified FTIR spectra of the catalysts.

The FT-IR spectra analyses were also performed to characterize the samples MIL-101(Al/Fe)-NH<sub>2</sub> (X), MIL-101(Al)-NH<sub>2</sub> and MIL-101(Fe)-NH<sub>2</sub>. As shown in Figure S2, the band at 3498.5 cm<sup>-1</sup> and 3370.5 cm<sup>-1</sup> referred to the primary amines (-NH<sub>2</sub>) on the organic linker.<sup>1</sup> The strong peaks at 1577 cm<sup>-1</sup> and 1373 cm<sup>-1</sup> occurring for all samples were attributed to the carboxylate linker, whereas bonds at 1644, 1441 and 1256 cm<sup>-1</sup> corresponded to the carboxyl groups of free aromatic carboxylic acid, the C=C stretching of benzenoid rings, and C-N vibration, respectively. The peak at 765cm<sup>-1</sup> was attributed to the out-of-plane bending vibration of C-H in the benzene ring.<sup>2</sup> All of the results were similar to those observed in MIL-101(Al)-NH<sub>2</sub> and MIL-101(Fe)-NH<sub>2</sub> samples. Nevertheless, the magnified IR spectra are shown in Figure S2b, the peaks below 1000 cm<sup>-1</sup> are correspond to Al-O and Fe-O bonds vibration. Unfortunately, there were no Fe-O bonds in the bimetallic infrared spectra due to the extremely small amount of iron.

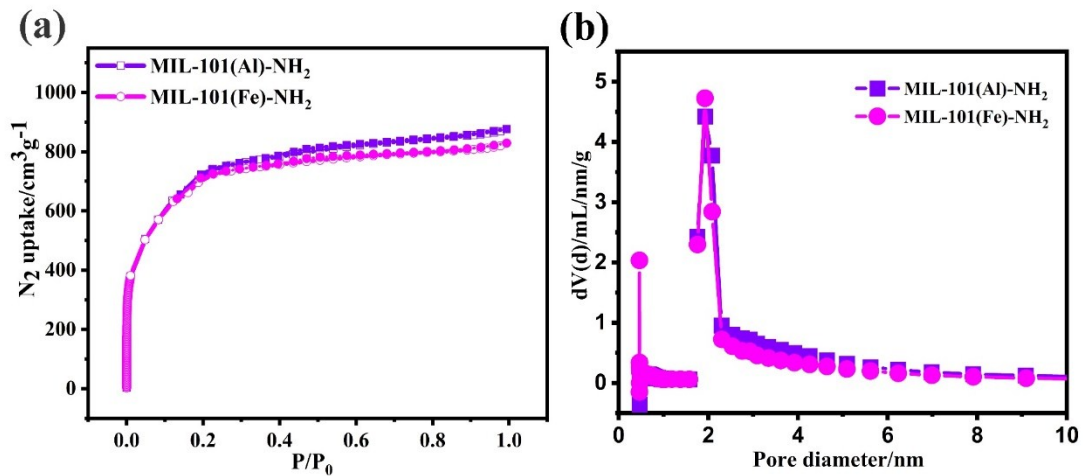

Fig. S3. (a) The  $N_2$  adsorption-desorption isotherms; (b) The pore size distribution of MIL-101(Al)- $\text{NH}_2$  and MIL-101(Fe)- $\text{NH}_2$ , respectively.

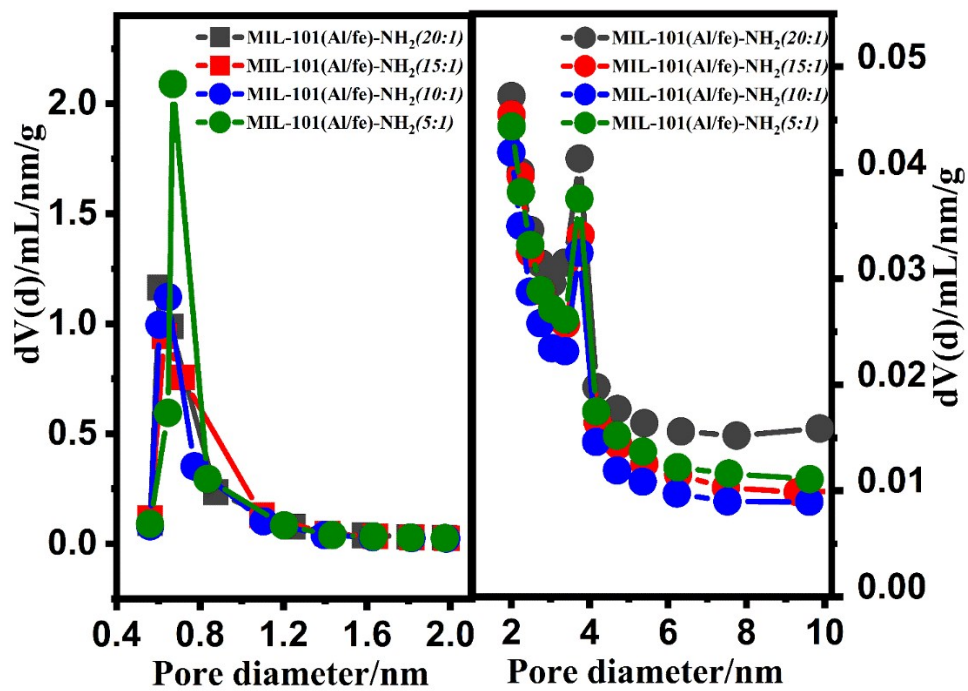

Fig. S4. The pore size distribution of MIL-101(Al/Fe)- $\text{NH}_2(20:1)$ , MIL-101(Al/Fe)- $\text{NH}_2(15:1)$ , MIL-101(Al/Fe)- $\text{NH}_2(10:1)$  and MIL-101(Al/Fe)- $\text{NH}_2(5:1)$ , respectively.

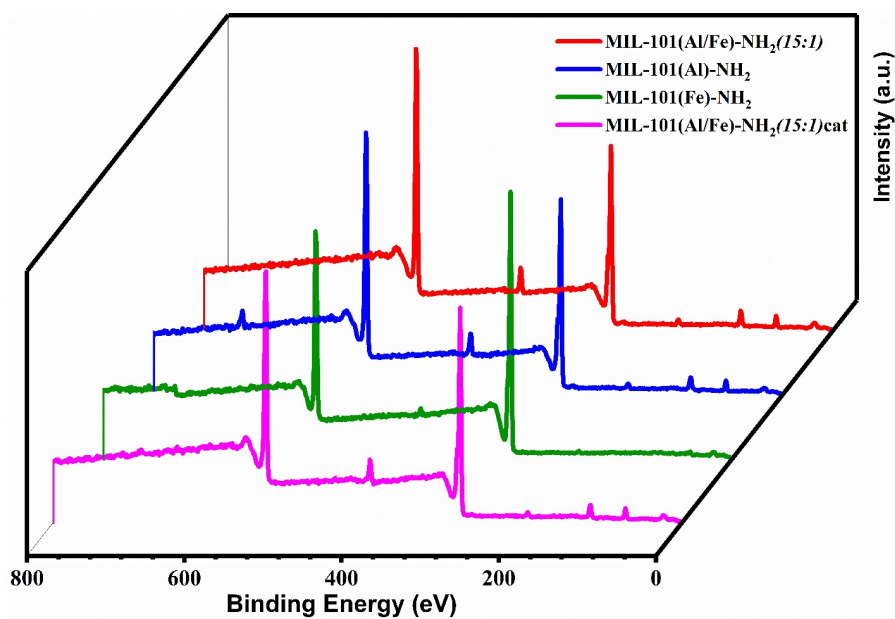

Fig. S5. The XPS spectra of the samples.

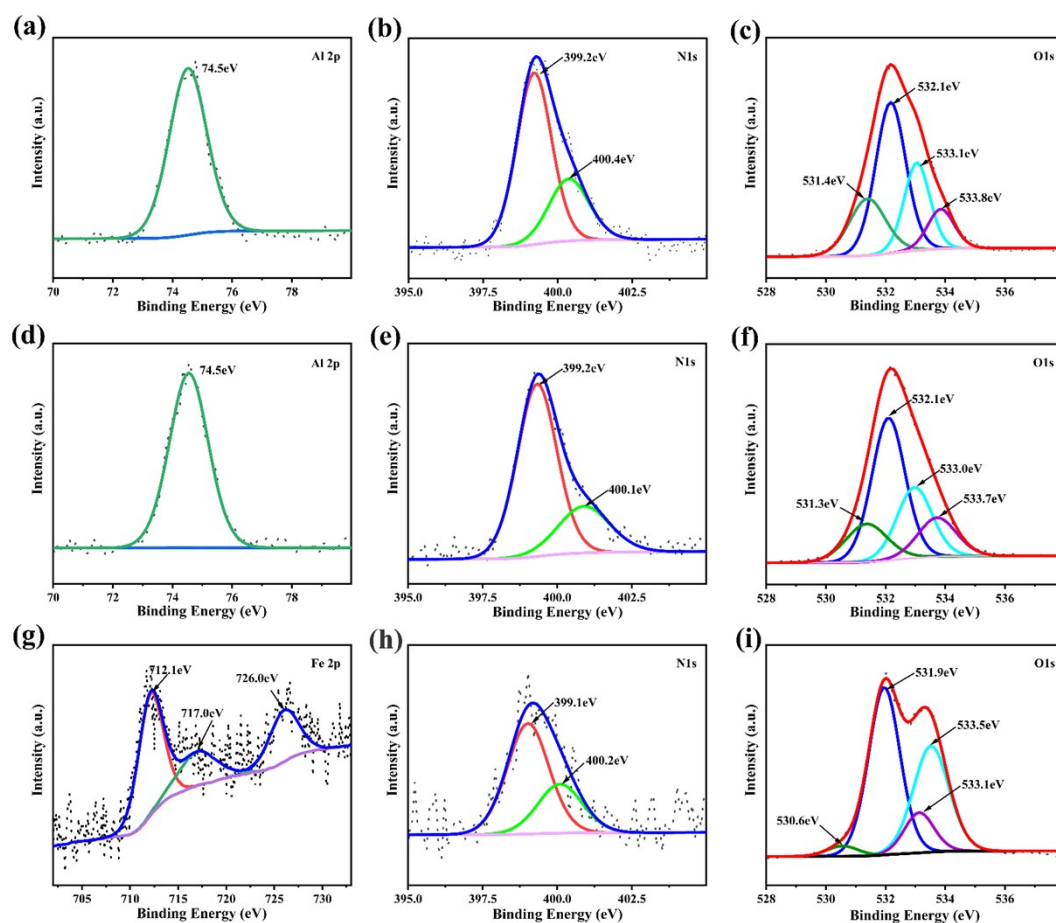

Fig. S6. High resolution of the XPS spectra of the catalysts. (a)-(c) MIL-101(Al/Fe)-NH<sub>2</sub> (15:1); (d)-(f) MIL-101(Al)-NH<sub>2</sub>; (g)-(i) MIL-101(Fe)-NH<sub>2</sub>.

The surface chemistry of the as-synthesized samples was also analyzed by XPS, and the diagrams were shown in Figure S5 and Figure S6. The high resolution XPS spectra of Al 2p, Fe 2p, N 1s and O 1s spectrums of the MIL-101(Al/Fe)-NH<sub>2</sub> (15:1), MIL-101(Al)-NH<sub>2</sub> and MIL-101(Fe)-NH<sub>2</sub> shows in the Fig. S6. As shown in Fig. S6a and S6d the peak at the binding energy of 74.5 eV was ascribed to Al<sup>3+</sup> 2p.<sup>3</sup> The Fe 2p XPS (Fig. S6g) electrons and binding energies of Fe<sup>3+</sup> 2p<sub>3/2</sub> and Fe<sup>3+</sup> 2p<sub>1/2</sub> peaks were located at 712.1 and 726.0 eV, respectively. Additionally, the peak at 717.0 eV was assigned to the satellite peak of Fe 2p<sub>3/2</sub>.<sup>4-6</sup> The N 1s of the MIL-101(Al/Fe)-NH<sub>2</sub> (15:1), MIL-101(Al)-NH<sub>2</sub> and MIL-101(Fe)-NH<sub>2</sub> have the same peaks were shown in Fig. S6b, S6e and S6h, the N1s were fitted into two peaks at 399.2 eV and 400.4 eV, which corresponded to C-N and N-H of the amine group on the organic linkers, respectively.<sup>7</sup> Concurrently, the O 1s XPS spectrum were fitted out four peaks with binding energies of 531.4 (Al-O), 532.1 (C=O), 533.1(C-O) and 533.8 eV(O-H) for the samples MIL-101(Al/Fe)-NH<sub>2</sub> (15:1) and MIL-101(Al)-NH<sub>2</sub>. Whereas MIL-101(Al)-NH<sub>2</sub> has a unique Fe-O bond at 530.6 eV which was shown in Fig. S6i. In the XPS spectrum of sample MIL-101(Al/Fe)-NH<sub>2</sub> (15:1), there is still no trace of iron due to its very little amount in the structure.

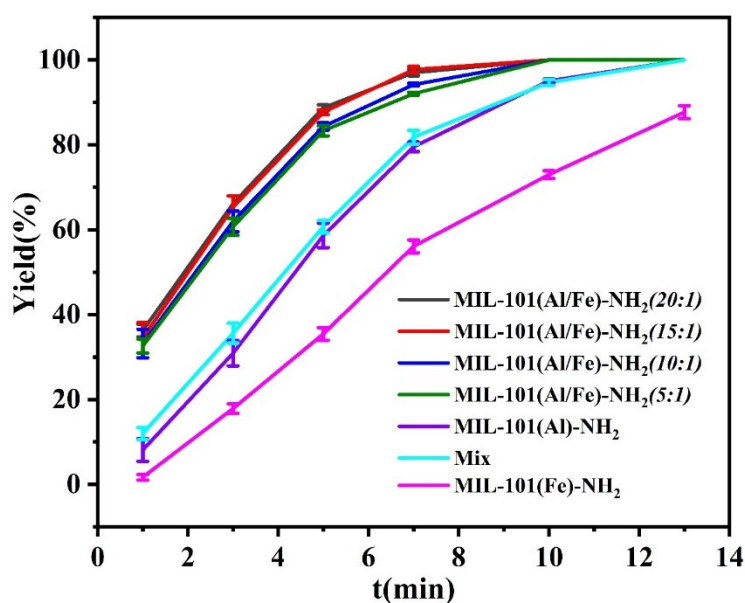

Fig. S7. The cascade reaction at 110°C.

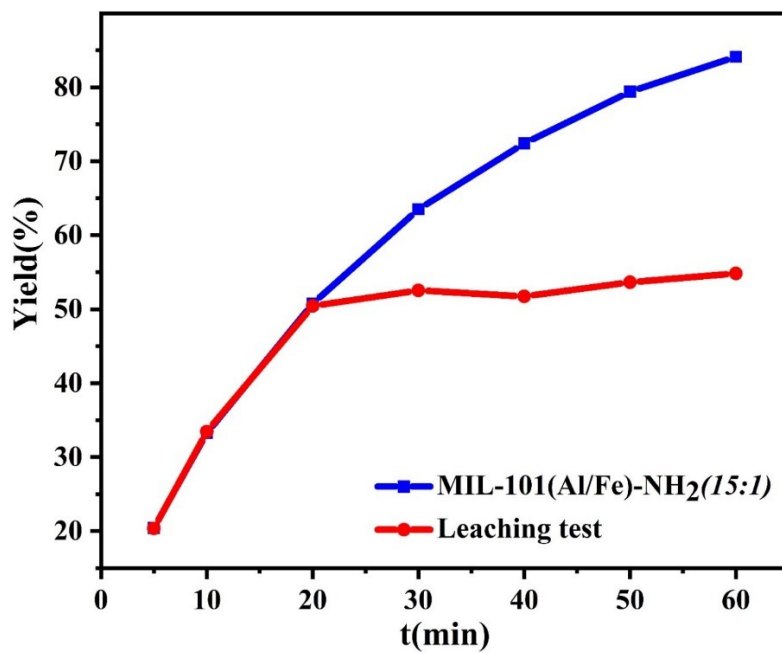

Fig. S8. The leaching test of the catalyst of MIL-101(Al/Fe)-NH<sub>2</sub>(15:1).

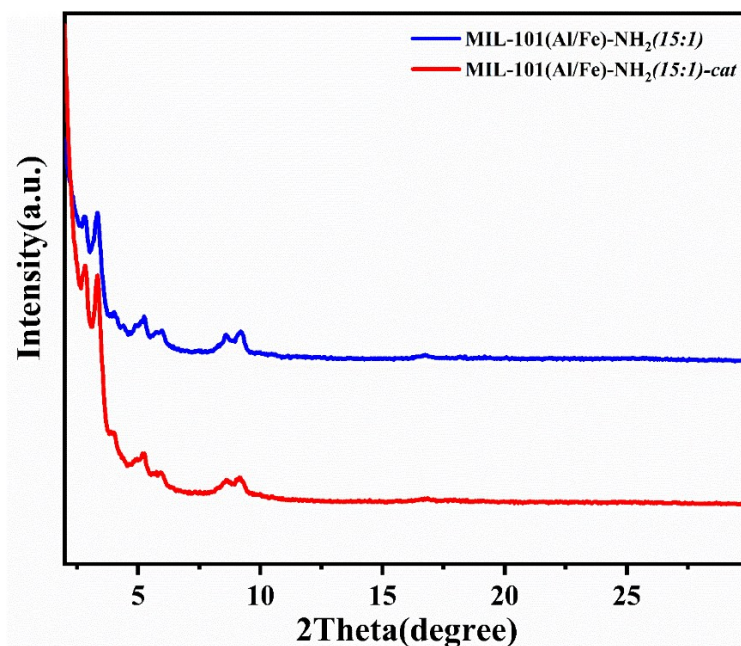

Fig. S9. The XRD of the MIL-101(Al/Fe)-NH<sub>2</sub> (15:1) and after catalyzed five cycles.



## References:

1. X. Li, A. K. Tjiptoputro, J. Ding, J. M. Xue and Y. Zhu, *Catalysis Today*, 2017, **279**, 77-83.
2. T. Araya, M. Jia, J. Yang, P. Zhao, K. Cai, W. Ma and Y. Huang, *Applied Catalysis B: Environmental*, 2017, **203**, 768-777.
3. N. M. Figueiredo, N. J. M. Carvalho and A. Cavaleiro, *Applied Surface Science*, 2011, **257**, 5793-5798.
4. M.-W. Zhang, K.-Y. A. Lin, C.-F. Huang and S. Tong, *Separation and Purification Technology*, 2019, **227**.
5. L. Chi, Q. Xu, X. Liang, J. Wang and X. Su, *Small*, 2016, **12**, 1351-1358.
6. M. C. Biesinger, B. P. Payne, A. P. Grosvenor, L. W. M. Lau, A. R. Gerson and R. S. C. Smart, *Applied Surface Science*, 2011, **257**, 2717-2730.
7. J. Xu, J. Gao, Y. Qi, C. Wang and L. Wang, *ChemCatChem*, 2018, **10**, 3327-3335.
